# Supplementary material for: Enrichment of Neurodegenerative Microglia Signature in Brain-Derived Extracellular Vesicles Isolated from Alzheimer’s Disease Mouse Models
Source: PubMed Central journal article supplement — J Proteome Res. 2021 Feb 3;20(3):1733–43. doi: 10.1021/acs.jproteome.0c00934 (PMC7944570; doi:10.1021/acs.jproteome.0c00934), 2021-02-03
Supplement: pr0c00934_si_001.pdf [file pr0c00934_si_001.pdf]

**Enrichment of neurodegenerative microglia signature in brain-derived extracellular vesicles isolated from Alzheimer's disease mouse model**

**Muraoka S, et al.**

**Journal of Proteome Research 2020.**

**Supplementary Figures and Tables**

**Supplementary Figure S1. Sequence coverage of identified tryptic fragment peptide from APP by LC-MS/MS analysis**

**Supplementary Figure S2. Assessment of ANXA5 protein by Proteomics and western blot**

**Supplementary Figure S3. Comparison of CAST.*APP/PS1* mouse brain-derived EV proteome and 5xFAD mouse brain-derived EV**

**Supplementary Figure S4. Comparison of CAST.*APP/PS1* mouse brain-derived EV proteome and human AD brain-derived EV proteome**

**Supplementary Figure S5. Image of the entire membrane for western Blots**

**Supplementary Table S1: Proteins identified and quantified in EVs from CAST.*APP/PS1* and CAST WT mouse brain (file type, excel)**

**Supplementary Table S2: Peptides identified and quantified in EVs from CAST.*APP/PS1* and CAST WT mouse brain (file type, excel)**

**Supplementary Table S3: List of identified APP peptides (file type, excel)**

mouse/human APP bearing the Swedish mutation (Mo/HuAPP695swe)

MLPSLALLLLAAWTVRALEVPTDGNAGLLAEPQIAMFCGKLNMHMNVQNGK  
WESDPSTKTCIGTKEGILQYCQEVPELQITNVVEANQPVTIQNWCKRGRK  
QCKTHTHVIPYR**CLVGEFVSDALLVPDK**CKFLHQERMDVCETHLHWHTVAK  
ETCSEKSTNLHDYGMLLPCGIDKFRGVFVCCPLAEESDSVDSADAEEDSD  
VWWGGADTDYADGGEDKVEVAEEEEVADVEEEEADDDDEDVEDGDEVEE  
EAEPYEEATERTTSTATTTTTTESVEEVRVPTTAASTPDAVDKYLET  
PDENEHAHFQKAKERLEAKHRERMSQVMREWEEAERQAKNLPKADKKAVIQH  
FQEKVESLEQEAANERQQLVETHMAR**VEAMLNDR**RRALALENYITALQAVPP  
RPHHVFNMLKKYVRAEQKDRQHTLKHFEHVRMVDPKAAQIRSQVMTHLRV  
IYERMNQSLSLLYNPAVAEEIQDEVELLQKEQNYSDVLANMISEPR**ISYG**  
**NDALMPSLTETK**TTVELLPVNGEFLDDLQPWHPFGVDSVPANTENEVEPV  
DARPAADRGLTTRPGSGLTNIKTEEISEV**NL**DAEFRHDSGYEVHHQ**KLVFFA**  
**EDVGSNK**GAIIGLMVGGVVIATVIVITLVMLKKKQYTSIHGVVEVDAAVTPEE  
RHLSK**MQQNGYENPTYKFFEQMQN**

**Supplementary Figure S1. Sequence coverage of identified tryptic fragment peptide from APP by LC-MS/MS analysis:** Identified peptides show in Red bold. The black line indicates amyloid beta peptide. The Swedish mutations show in Green bold.

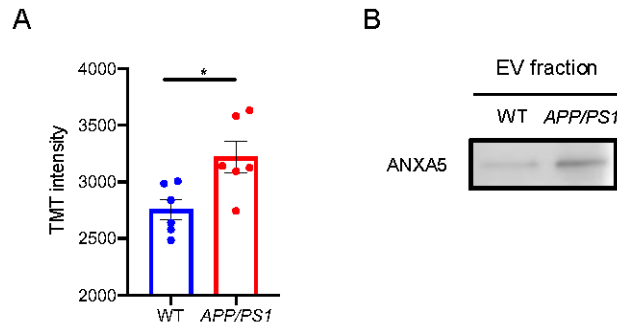

**Supplementary Figure S2. Assessment of ANXA5 protein by Proteomics and Western blot:**  
**A)** A box plot of TMT-reporter intensity by proteomics. ( $-\log_{10}(p\text{-value}) = 1.756$ ,  $FC = 1.16$ ). The t.test was calculated by Welch's test. **B)** Validation of proteomic result using Western blot.

A

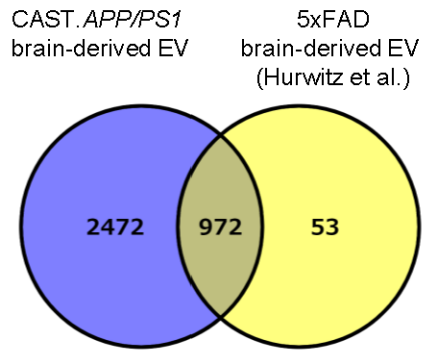

B

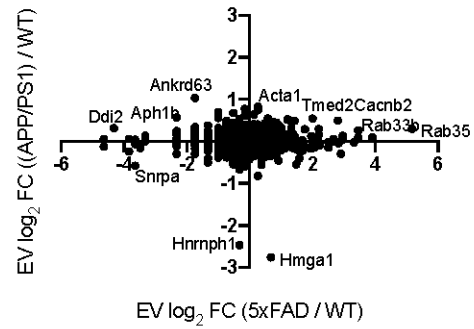

**Supplementary Figure S3. Comparison of CAST.*APP/PS1* mouse brain-derived EV proteome and 5xFAD mouse brain-derived EV:** **A)** The 5xFAD mouse brain-derived EV proteome were identified 1025 proteins<sup>1</sup>. The 972 proteins were common between CAST.*APP/PS1* mouse brain-derived EV and 5xFAD mouse brain-derived EV proteins. **B)** Scattered plot of CAST.*APP/PS1* mouse brain-derived EV and 5xFAD mouse brain-derived EV proteins.

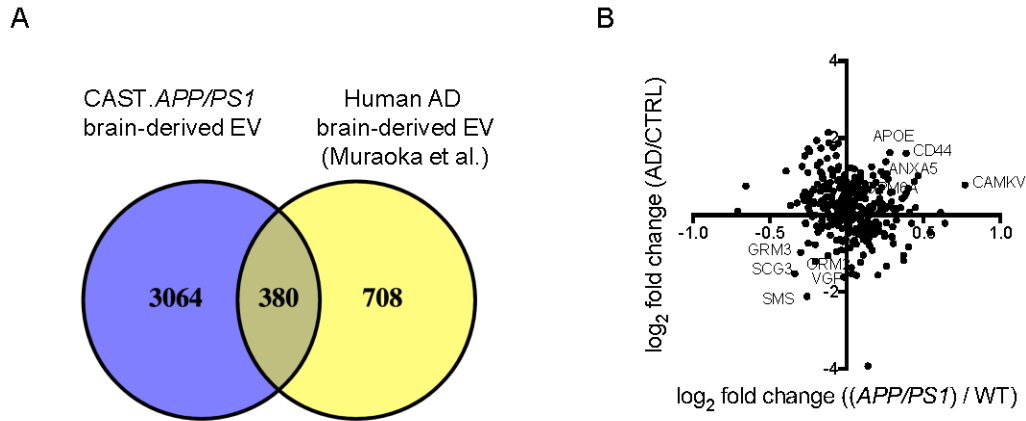

**Supplementary Figure S4. Comparison of CAST.*APP/PS1* mouse brain-derived EV proteome and human AD brain-derived EV proteome: A)** The human AD brain-derived EV proteome were identified 1088 proteins<sup>2</sup>. The 380 proteins were common between CAST.*APP/PS1* mouse brain-derived EV and human AD brain-derived EV proteins. **B)** Scattered plot of CAST.*APP/PS1* mouse brain-derived EV and human AD brain-derived EV proteins ( $\rho = -0.1545$ ,  $p = 0.0061$  using two-tailed t-test).

Figure 1C

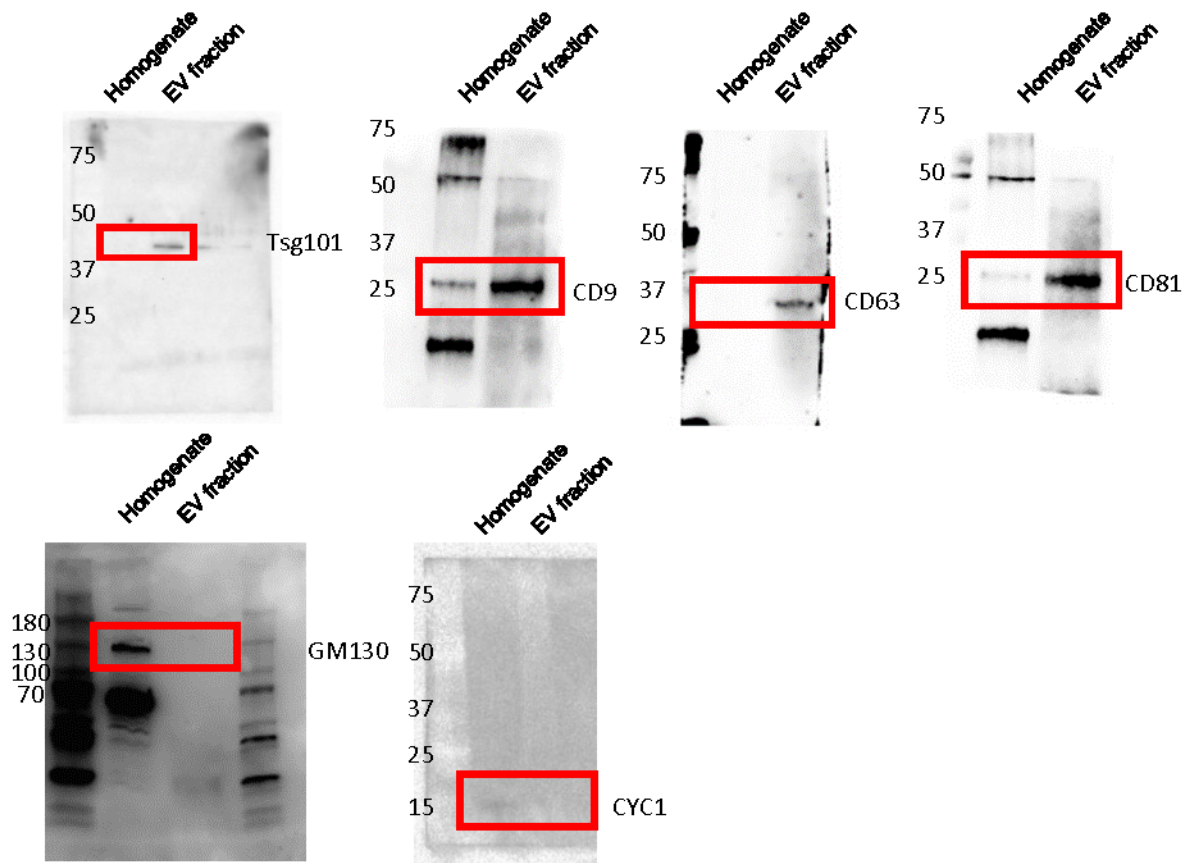

Figure 4F

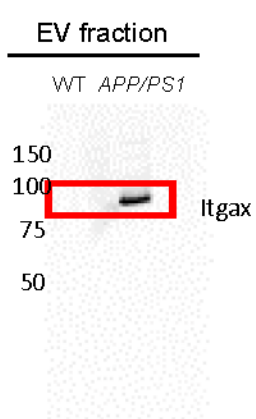

Figure S2

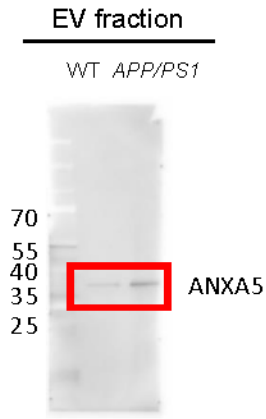

Supplementary Figure S5. Image of the entire membrane for Western Blots

## Reference

- (1) Hurwitz, S. N.; Sun, L.; Cole, K. Y.; Ford, C. R.; Olcese, J. M.; Meckes, D. G. An optimized method for enrichment of whole brain-derived extracellular vesicles reveals insight into neurodegenerative processes in a mouse model of Alzheimer's disease. *J. Neurosci. Methods* **2018**, *307*, 210–220.
- (2) Muraoka, S.; DeLeo, A. M.; Sethi, M. K.; Yukawa-Takamatsu, K.; Yang, Z.; Ko, J.; Hogan, J. D.; Ruan, Z.; You, Y.; Wang, Y.; et al. Proteomic and biological profiling of extracellular vesicles from Alzheimer's disease human brain tissues. *Alzheimers Dement* **2020**, *16* (6), 896–907.
